# Supplementary material for: Self Standing Mats of Blended Polyaniline Produced by Electrospinning
Source: MDPI journal article supplement (doi:10.3390/nano11051269), 2021-05-12

# Self Standing Mats of Blended Polyaniline Produced by Electrospinning

Antonio Fotia <sup>1</sup>, Angela Malara <sup>2,3,\*</sup>, Emilia Paone <sup>2,3</sup>, Lucio Bonaccorsi <sup>2,3</sup>, Patrizia Frontera <sup>2,3</sup>, Giulia Serrano <sup>3,4</sup> and Andrea Caneschi <sup>3,4</sup>

<sup>1</sup> Department of Information Engineering, Infrastructures and Sustainable Energy, Mediterranean University of Reggio Calabria, Via Graziella Loc Feo di Vito, 89134 Reggio Calabria, Italy; antonio.fotia@unirc.it

<sup>2</sup> Department of Civil, Energy, Environment and Material Engineering, Mediterranean University of Reggio Calabria, Via Graziella Loc Feo di Vito, 89134 Reggio Calabria, Italy; emilia.paone@unirc.it (E.P.); lucio.bonaccorsi@unirc.it (L.B.); patrizia.frontera@unirc.it (P.F.)

<sup>3</sup> Consorzio Interuniversitario per la Scienza e la Tecnologia dei Materiali (INSTM), 50121 Firenze, Italy; giulia.serrano@unifi.it (G.S.); andrea.caneschi@unifi.it (A.C.)

<sup>4</sup> Department of Industrial Engineering – DIEF, University of Florence, Via di S. Marta 3, 50139 Firenze, Italy

\* Correspondence: angela.malara@unirc.it (A.M.)

## List of Supplementary Information

Figure S1: Scheme of the experimental set-up.

Figure S2: Digital Images of electrospun mats PANI/PMMA (1:1) and PANI/PVAc (1:1).

Figure S3: Electrospayed polyaniline PANI.

Figure S4: Effect of PANI concentration in the solution to electrospun SEM images of (a) PANI/PMMA (1:1), (b) PANI/PMMA (3:1).

Figure S5: Effect of molecular weight of PVAc co-polymer SEM images of (a) PANI/PVAc<sub>LMW</sub> (1:1), (b) PANI/PVAc (2:1).

Figure S6: Equivalent circuit.

Figure S1

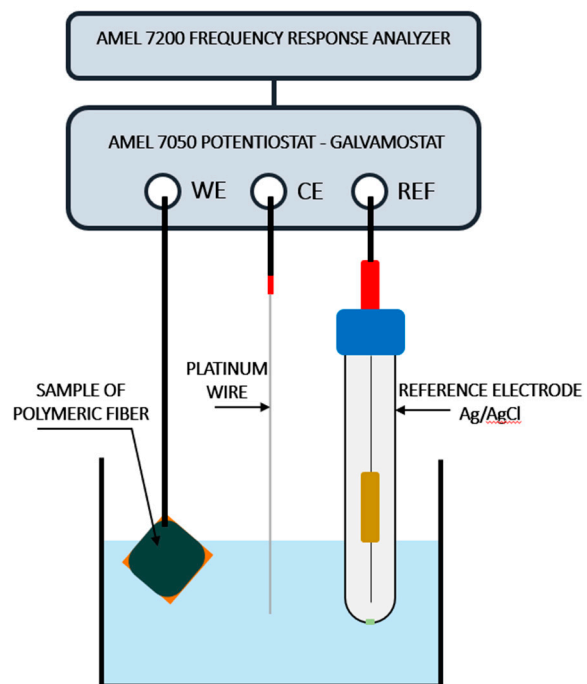

Figure S2

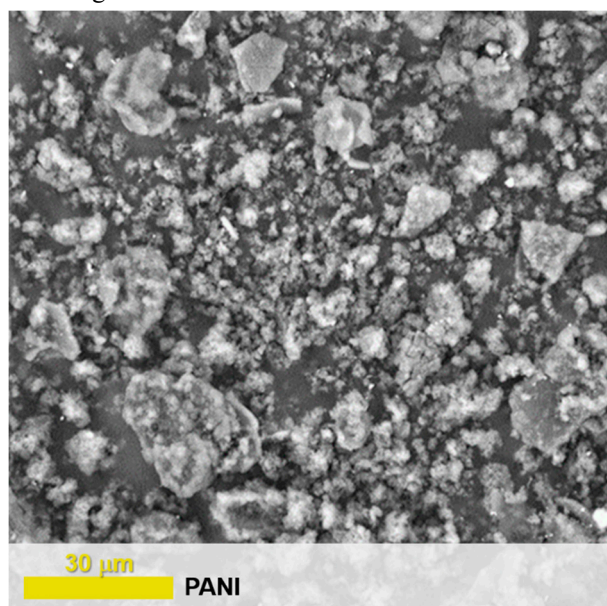

Figure S3

(a)

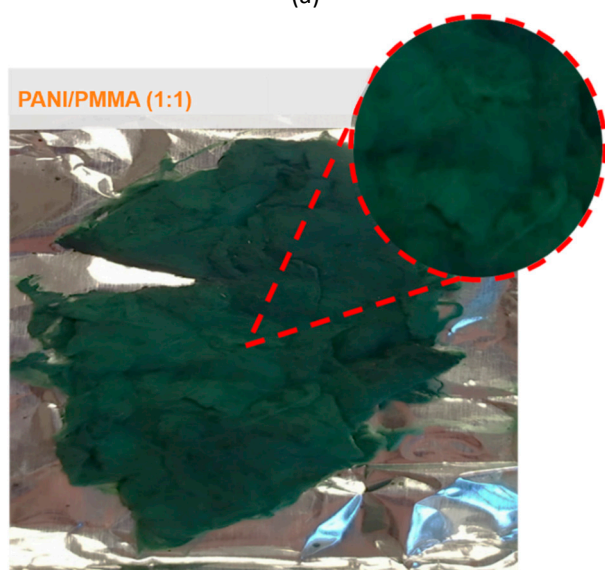

(b)

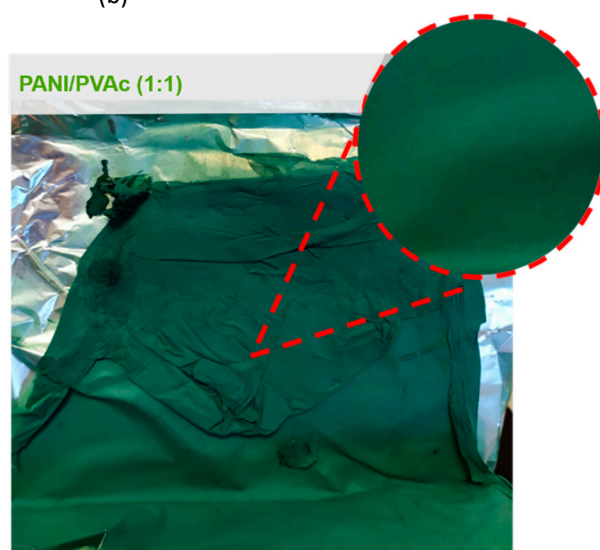

Figure S4

(a)

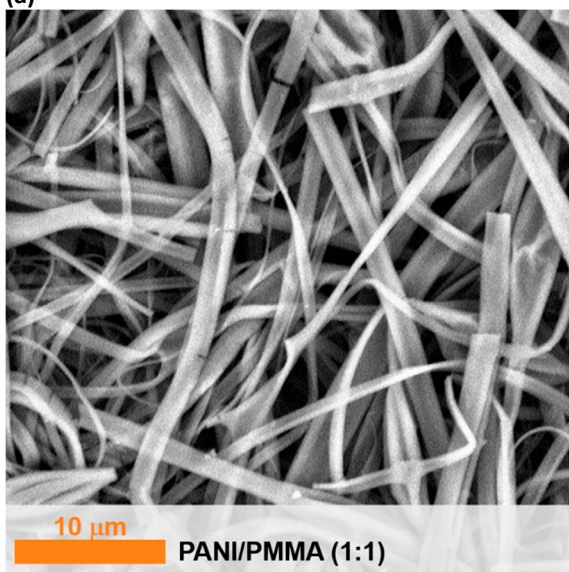

(b)

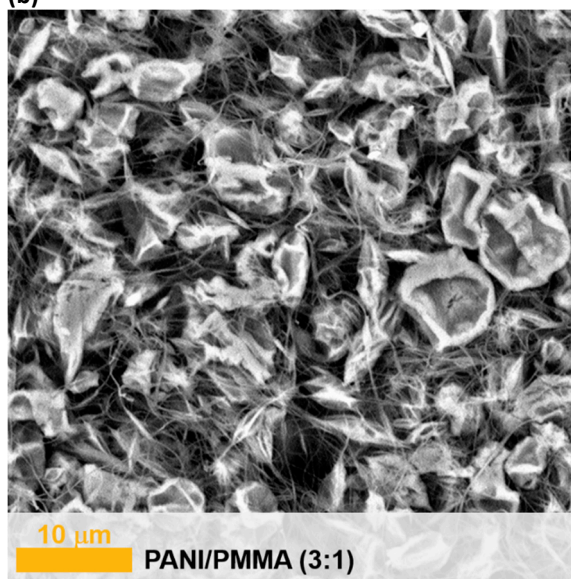

Figure S5

(a)

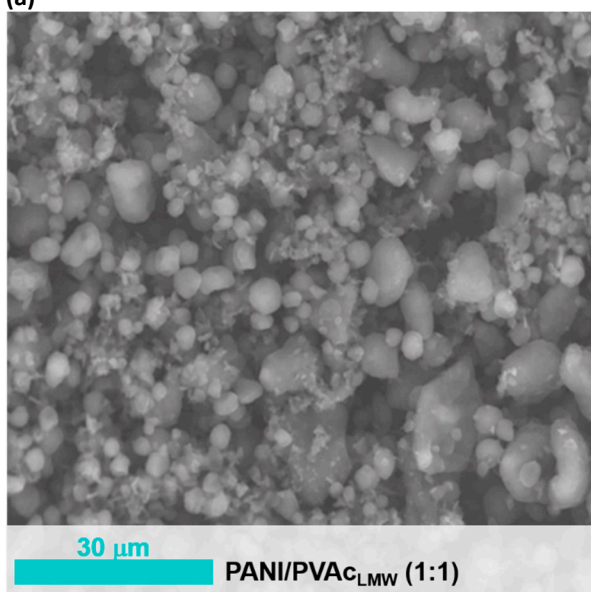

(b)

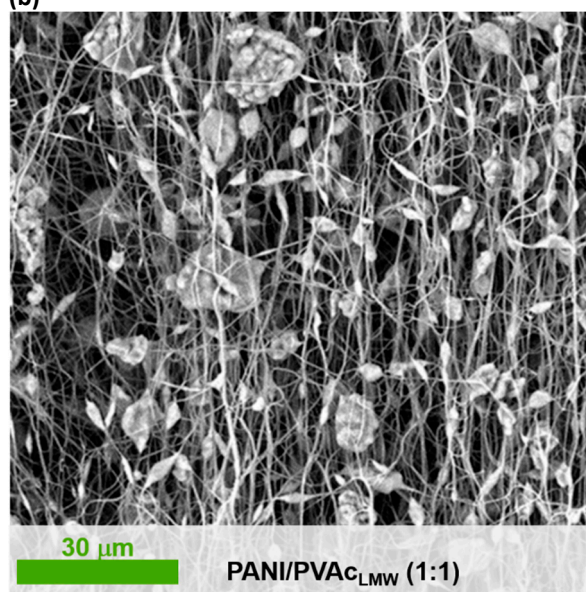

Figure S6

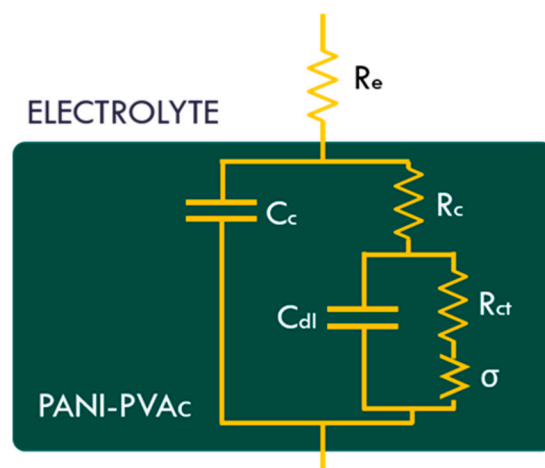

Supplement: s1 [file s1]
